1 **A draft genome assembly of the eastern banjo frog *Limnodynastes dumerilii***  
2 ***dumerilii* (Anura: Limnodynastidae)**

3 Qiye Li<sup>1,2</sup>, Qunfei Guo<sup>1,3</sup>, Yang Zhou<sup>1</sup>, Huishuang Tan<sup>1,4</sup>, Terry Bertozzi<sup>5,6</sup>, Yuanzhen Zhu<sup>1,7</sup>,  
4 Ji Li<sup>2,8</sup>, Stephen Donnellan<sup>5</sup>, Guojie Zhang<sup>2,8,9,10\*</sup>

5  
6 <sup>1</sup> BGI-Shenzhen, Shenzhen 518083, China

7 <sup>2</sup> State Key Laboratory of Genetic Resources and Evolution, Kunming Institute of Zoology,  
8 Chinese Academy of Sciences, Kunming 650223, China

9 <sup>3</sup> College of Life Science and Technology, Huazhong University of Science and Technology,  
10 Wuhan 430074, China

11 <sup>4</sup> Center for Informational Biology, University of Electronic Science and Technology of China,  
12 Chengdu 611731, China

13 <sup>5</sup> South Australian Museum, North Terrace, Adelaide 5000, Australia

14 <sup>6</sup> School of Biological Sciences, University of Adelaide, North Terrace, Adelaide 5005,  
15 Australia

16 <sup>7</sup> School of Basic Medicine, Qingdao University, Qingdao 266071, China

17 <sup>8</sup> China National Genebank, BGI-Shenzhen, Shenzhen 518120, China

18 <sup>9</sup> Center for Excellence in Animal Evolution and Genetics, Chinese Academy of Sciences,  
19 650223, Kunming, China

20 <sup>10</sup> Section for Ecology and Evolution, Department of Biology, University of Copenhagen, DK-  
21 2100 Copenhagen, Denmark

22 \* Correspondence: [guojie.zhang@bio.ku.dk](mailto:guojie.zhang@bio.ku.dk) (G.Z.).

23

24 e-mail addresses for all authors:

25 Qiye Li <[liqiye@genomics.cn](mailto:liqiye@genomics.cn)>, Qunfei Guo <[guoqunfei@genomics.cn](mailto:guoqunfei@genomics.cn)>, Yang Zhou  
26 <[zhouyang@genomics.cn](mailto:zhouyang@genomics.cn)>, Huishuang Tan <[tanhuishuang@genomics.cn](mailto:tanhuishuang@genomics.cn)>, Terry Bertozzi  
27 <[Terry.Bertozzi@samuseum.sa.gov.au](mailto:Terry.Bertozzi@samuseum.sa.gov.au)>, Yuanzhen Zhu <[zhuyuanzhen@genomics.cn](mailto:zhuyuanzhen@genomics.cn)>, Ji Li  
28 <[ljjl@genomics.cn](mailto:ljjl@genomics.cn)>, Stephen Donnellan <[Steve.Donnellan@samuseum.sa.gov.au](mailto:Steve.Donnellan@samuseum.sa.gov.au)> and  
29 Guojie Zhang <[guojie.zhang@bio.ku.dk](mailto:guojie.zhang@bio.ku.dk)>

30

31 ORCIDs:

32 Qiye Li: 0000-0002-5993-0312; Yang Zhou: 0000-0003-1247-5049; Terry Bertozzi: 0000-0001-6665-3395;  
33 Stephen Donnellan: 0000-0002-5448-3226; Guojie Zhang: 0000-0001-6860-1521

## 34 **Abstract**

35 Amphibian genomes are usually challenging to assemble due to large genome size and high  
36 repeat content. The Limnodynastidae is a family of frogs native to Australia, Tasmania and  
37 New Guinea. As an anuran lineage that successfully diversified on the Australian continent, it  
38 represents an important lineage in the amphibian tree of life but lacks reference genomes. Here  
39 we sequenced and annotated the genome of the eastern banjo frog *Limnodynastes dumerilii*  
40 *dumerilii* to fill this gap. The total length of the genome assembly is 2.38 Gb with a scaffold  
41 N50 of 285.9 kb. We identified 1.21 Gb of non-redundant sequences as repetitive elements and  
42 annotated 24,548 protein-coding genes in the assembly. BUSCO assessment indicated that  
43 more than 94% of the expected vertebrate genes were present in the genome assembly and the  
44 gene set. We anticipate that this annotated genome assembly will advance the future study of  
45 anuran phylogeny and amphibian genome evolution.

## 46 Introduction

47 The recent powerful advances in genome sequencing technology have allowed efficient  
48 decoding of the genomes of many species [1, 2]. So far, genome sequences are available  
49 publicly for more than one thousand species sampled across the animal branch of the tree of  
50 life. These genomic resources have provided vastly improved perspectives on our knowledge  
51 of the origin and evolutionary history of metazoans [3, 4], facilitated advances in agriculture  
52 [5], enhanced approaches for conservation of endangered species [6], and uncovered the  
53 genomic changes underlying the evolutionary successes of some clades such as birds [7] and  
54 insects [8]. However, amphibian genomes are still challenging to assemble due to their large  
55 genome sizes, high repeat content and sometimes high heterozygosity if specimens are  
56 collected from wild populations [9]. This also accounts for the scarcity of reference genomes  
57 for Anura (frogs and toads) — the most species-rich order of amphibians including many  
58 important models for developmental biology and environmental monitoring [10]. Specifically,  
59 despite the existence of more than 7,000 living species of Anura [11], only 10 species have  
60 their genomes sequenced and annotated to date [12-21], which cover only 8 out of the 54 anuran  
61 families. Moreover, genomes of Neobatrachia, which contains more than 95% of the anuran  
62 species [11], are particularly under-represented. Only 5 of the 10 publicly available anuran  
63 genomes belong to Neobatrachia [22]. This deficiency of neobatrachian genomes would  
64 undoubtedly restrict the study of the genetic basis underlying the great diversification of this  
65 amphibian lineage, and our understanding of the adaptive genomic changes that facilitate the  
66 aquatic to terrestrial transition of vertebrates and the numerous unique reproductive modes  
67 found in this clade.

68 As a candidate species proposed for genomic analysis by the Genome 10K (G10K) initiative  
69 [9], we sequenced and annotated the genome of the Australian banjo frog *Limnodynastes*  
70 *dumerilii* (also called the pobblebonk; NCBI:txid104065) to serve as a representative species  
71 of the neobatrachian family Limnodynastidae. This burrowing frog is endemic to Australia and  
72 named after its distinctive "bonk" call, which is likened to a banjo string being plucked. It  
73 mainly occurs along the southeast coast of Australia, from the coast of New South Wales,  
74 throughout Victoria and into the southwest corner of South Australia and Tasmania [23]. Five  
75 subspecies of *L. dumerilii* are recognized, including *Limnodynastes dumerilii dumerilii*, *L.*  
76 *dumerilii grayi*, *L. dumerilii fryi*, *L. dumerilii insularis* and *L. dumerilii variegata* [24]. The  
77 subspecies chosen for sequencing is the eastern banjo frog *L. dumerilii dumerilii*  
78 (NCBI:txid104066), as it is the most widespread among the five subspecies and forms hybrid

79 zones with a number of the other subspecies [23]. We believe that the release of genomic  
80 resources from this neobatrachian frog will benefit the future studies of phylogenomics and  
81 comparative genomics of anurans, and also facilitate other research related to the evolutionary  
82 biology of *Limnodynastes*.

83

## 84 **Methods**

### 85 **Sample collection, library construction and sequencing**

86 Genomic DNA was extracted from the liver of an adult female *Limnodynastes dumerilii*  
87 *dumerilii* (Fig. 1) using the Gentra Puregene Tissue Kit (QIAGEN, Hilden, Germany)  
88 according to manufacturer's instructions with the following exceptions: following the DNA  
89 precipitation step, DNA was spooled onto a glass rod, washed twice in 70% ethanol and dried  
90 before dissolving in 100 ul of the recommended elution buffer [25]. The specimen was  
91 originally caught in River Torrens, Adelaide, South Australia, Australia, and is archived in the  
92 South Australian Museum (registration number: SAMAR66870).

93 A total of 211 Gb of sequence was generated from four short-insert libraries (170 bp × 1, 250  
94 bp × 1, 500 bp × 1, and 800 bp × 1), and 185 Gb of sequence from ten mate-paired libraries (2  
95 kb × 3, 5 kb × 3, 10 kb × 2, and 20 kb × 2). All the 14 libraries were subject to paired-end  
96 sequencing on the HiSeq 2000 platform following the manufacturer's instructions (Illumina,  
97 San Diego, CA, USA), using PE100 or PE150 chemistry for the short-insert libraries and PE49  
98 for the mate-paired libraries [26] (Table 1). Low-quality reads, adapter-contaminated reads,  
99 and duplicated reads arising from polymerase chain reaction (PCR) amplification during  
100 library construction were removed by SOAPnuke (v1.5.3, RRID:SCR\_015025) [27] prior to  
101 downstream analyses. This yielded a total of 180 Gb of clean sequence for genome assembly,  
102 which represents 71 times coverage of the estimated haploid genome size of *L. d. dumerilii* in  
103 terms of sequence depth, and 1,198 times in terms of physical depth (Table 1).

104

### 105 **Genome size estimation and genome assembly**

106 To obtain a robust estimation of the genome size of *L. d. dumerilii*, we conducted *k*-mer  
107 analysis with all of the clean sequence (130 Gb) from the four short-insert libraries using a  
108 range of *k* values (17, 19, 21, 23, 25, 27, 29 and 31). The *k*-mer frequencies were counted by  
109 Jellyfish (v2.2.6) [28] with the *-C* setting. The genome size of *L. d. dumerilii* was estimated to  
110 be around 2.54 Gb (Table 2), which was calculated as the number of effective *k*-mers (i.e. total  
111 *k*-mers – erroneous *k*-mers) divided by the homozygous peak depth following Cai *et al* [29]. It

112 is noteworthy that, the presence of a distinct heterozygous peak, which displayed half of the  
113 depth of the homozygous peak in the  $k$ -mer frequency distribution, suggests that the diploid  
114 genome of this wild-caught individual has a high level of heterozygosity (Fig. 2). The rate of  
115 heterozygosity was estimated to be around 1.17% by GenomeScope (v1.0.0,  
116 RRID:SCR\_017014) [30] (Table 2).

117 We then employed Platanus (v1.2.1, RRID:SCR\_015531) [31] to assemble the genome of *L.*  
118 *d. dumerilii*. Briefly, all the clean sequence from the four short-insert libraries were first  
119 assembled into contigs using *platanus assemble* with parameters *-t 20 -k 29 -u 0.2 -d 0.6 -m*  
120 *150*. Then paired-end reads from the four short-insert and ten mate-paired libraries were used  
121 to connect contigs into scaffolds by *platanus scaffold* with parameters *-t 20 -u 0.2 -l 3* and the  
122 insert size information of each library. Finally, *platanus gap\_close* was employed to close  
123 intra-scaffold gaps using the paired-end reads from the four short-insert libraries with default  
124 settings. This Platanus assembly was further improved by Kgf (version 1.16) [9] followed by  
125 GapCloser (v1.10.1, RRID:SCR\_015026) [9] for gap filling with the clean reads from the four  
126 short-insert libraries.

127

### 128 **Repetitive element annotation**

129 Both homology-based and *de novo* predictions were employed to identify repetitive elements  
130 in the *L. d. dumerilii* genome assembly [32]. For homology-based prediction, known repetitive  
131 elements were identified by aligning the *L. d. dumerilii* genome sequences against the Rebase-  
132 derived RepeatMasker libraries using RepeatMasker (v4.1.0, RRID:SCR\_012954; setting *-*  
133 *now -norna -no\_is*) [33], and against the transposable element protein database using  
134 RepeatProteinMask (an application within the RepeatMasker package; setting *-noLowSimple -*  
135 *pvalue 0.0001 -engine ncbi*). For *de novo* prediction, RepeatModeler (v2.0,  
136 RRID:SCR\_015027) [34] was first executed on the *L. d. dumerilii* assembly to build a *de novo*  
137 repeat library for this species. Then RepeatMasker was employed to align the *L. d. dumerilii*  
138 genome sequences against the *de novo* library for repetitive element identification. Tandem  
139 repeats in the *L. d. dumerilii* genome assembly were identified by Tandem Repeats Finder  
140 (v4.09) [35] with parameters *Match=2 Mismatch=7 Delta=7 PM=80 PI=10 Minscore=50*  
141 *MaxPeriod=2000*.

142

### 143 **Protein-coding gene annotation**

144 Similar to repetitive element annotation, both homology-based and *de novo* predictions were  
145 employed to build gene models for the *L. d. dumerilii* genome assembly [36]. For homology-  
146 based prediction, protein sequences from diverse vertebrate species, including *Danio rerio*,  
147 *Xenopus tropicalis*, *Xenopus laevis*, *Nanorana parkeri*, *Microcaecilia unicolor*, *Rhinatrema*  
148 *bivittatum*, *Anolis carolinensis*, *Gallus gallus* and *Homo sapiens*, were first aligned to the *L.*  
149 *d. dumerilii* genome assembly using TBLASTN (blast-2.2.26, RRID:SCR\_011822) [37] with  
150 parameters *-F F -e 1e-5*. Then the genomic sequences of the candidate loci together with 5  
151 kb flanking sequences were extracted for exon-intron structure determination, by aligning  
152 the homologous proteins to these extracted genomic sequences using GeneWise (wise-2.2.0,  
153 RRID:SCR\_015054) [38]. For *de novo* prediction, we randomly picked 1,000 homology-  
154 derived gene models of *L. d. dumerilii* with complete open reading frames (ORFs) and  
155 reciprocal aligning rates exceeding 90% against the *X. tropicalis* proteins to train  
156 AUGUSTUS (v3.3.1, RRID:SCR\_008417) [39]. The obtained gene parameters were then  
157 used by AUGUSTUS to predict protein-coding genes on the repeat-masked *L. d. dumerilii*  
158 genome assembly. Finally, gene models derived from the above two methods were  
159 combined into a non-redundant gene set using a similar strategy to Xiong *et al.* (2016) [40].  
160 Genes showing BLASTP (blast-2.2.26, RRID:SCR\_001010; parameters *-F F -e 1e-5*) hits  
161 to transposon proteins in the UniProtKB/Swiss-Prot database (v2019\_11), or with more than  
162 70% of their coding regions overlapping repetitive sequences, were removed from the  
163 combined gene set.

164

## 165 **Results and Discussion**

### 166 **Assembly and annotation of the *L. d. dumerilii* genome**

167 We assembled the nuclear genome of a female eastern banjo frog *L. d. dumerilii* (Fig. 1) with  
168 ~180 Gb (71X) clean Hiseq data from four short-insert libraries (170 bp × 1, 250 bp × 1, 500  
169 bp × 1, and 800 bp × 1) and ten mate-paired libraries (2 kb × 3, 5 kb × 3, 10 kb × 2, and 20 kb  
170 × 2) (Table 1). The final genome assembly comprised 520,896 sequences with contig and  
171 scaffold N50s of 10.2 kb and 286.0 kb, respectively, and a total length of 2.38 Gb, which is  
172 close to the estimated genome size of 2.54 Gb by *k*-mer analysis (Table 2 and Fig. 2). There  
173 are 242 Mb of regions present as unclosed gaps (Ns), accounting for 10.2% of the assembly.  
174 The GC content of the *L. d. dumerilii* assembly excluding gaps was estimated to be 41.0%. The  
175 combination of homology-based and *de novo* prediction methods masked 1.21 Gb of non-  
176 redundant sequences as repetitive elements, accounting for 56.4 % of the *L. d. dumerilii*

177 genome assembly excluding gaps (Table 3). We also obtained 24,548 protein-coding genes  
178 in the genome assembly, of which 67% had complete ORF. Functional annotation by  
179 searching the *L. d. dumerilii* proteins against public databases of UniProtKB/Swiss-Prot  
180 (v2019\_11, RRID:SCR\_004426) [41], NCBI nr (v20191030), and KEGG (v93.0,  
181 RRID:SCR\_012773) [42] with BLASTP (blast-2.2.26; parameters *-F F -e 1e-5*) successfully  
182 annotated almost all of the *L. d. dumerilii* gene loci (Table 4).

183

#### 184 **Data validation and quality control**

185 Two strategies were employed to estimate the completeness of the *L. d. dumerilii* genome  
186 assembly. First, all the clean reads from the short-insert libraries were aligned to the genome  
187 assembly using BWA-MEM (BWA, version 0.7.16, RRID:SCR\_010910) with default  
188 parameters [43]. We observed that 99.6 % of reads could be mapped back to the assembled  
189 genome and 85.6 % of the inputted reads were mapped in proper pairs as accessed by samtools  
190 flagstat (SAMtools v1.7, RRID:SCR\_002105), suggesting that most sequences of the *L. d.*  
191 *dumerilii* genome were present in the current assembly. Secondly, we assessed the *L. d.*  
192 *dumerilii* assembly with Benchmarking Universal Single-Copy Orthologs (BUSCO; v3.0.2,  
193 RRID:SCR\_015008), a software package that can quantitatively measure genome assembly  
194 completeness based on evolutionarily informed expectations of gene content [44], and found  
195 that up to 94.7 % of the 2,586 expected vertebrate genes were present in the *L. d. dumerilii*  
196 assembly. Furthermore, 85.5% and 84.5 % of the expected genes were identified as complete  
197 and single-copy genes, respectively. This BUSCO assessment further highlighted the  
198 comprehensiveness of the current *L. d. dumerilii* genome assembly in terms of gene space.

199 We then evaluated the completeness of the *L. d. dumerilii* protein-coding gene set with BUSCO  
200 (v3.0.2) and DOGMA (v3.0, RRID:SCR\_015060) [45], a program that measures the  
201 completeness of a given transcriptome or proteome based on a core set of conserved domain  
202 arrangements (CDAs). BUSCO analysis showed that 97.1 % of the expected vertebrate genes  
203 were present in the *L. d. dumerilii* protein-coding gene set with 88.5 % and 84.5% identified  
204 as complete and single-copy genes, respectively, close to that estimated for the genome  
205 assembly. Meanwhile, DOGMA analysis based on PfamScan Annotations (PfamScan v1.5;  
206 Pfam v32.0, RRID:SCR\_015060) [46] and the eukaryotic core set identified 95.4 % of the  
207 expected CDAs in the annotated gene set. These results demonstrated the high completeness  
208 of the *L. d. dumerilii* protein-coding gene set.

209

## 210 **Re-use potential**

211 Here, we report a draft genome assembly of the eastern banjo frog *L. d. dumerilii*. It represents  
212 the first genome assembly from the family Limnodynastidae (Anura: Neobatrachia). Although  
213 the continuity of the assembly in terms of contig and scaffold N50s is modest, probably due to  
214 the high repeat content (56%) and heterozygosity (1.17%), the completeness of this draft  
215 assembly is demonstrated to be high according to read mapping and BUSCO assessment. Thus,  
216 it is suitable for phylogenomics and comparative genomics analyses with other available  
217 anuran genomes or phylogenomic datasets. In particular, the high-quality protein-coding gene  
218 set derived from the genome assembly will be useful for deducing orthologous relationships  
219 across anuran species or reconstructing the ancestral gene content of anurans. Due to  
220 evolutionary importance of *Limnodynastes* frogs in Australia, the genomic resources released  
221 in this study will also support further research on the biogeography of speciation, evolution of  
222 male advertisement calls, hybrid zone dynamics, and conservation of *Limnodynastes* frogs.

223

## 224 **Availability of supporting data**

225 The raw sequencing reads are deposited in NCBI under the BioProject accession  
226 PRJNA597531 and are also deposited in the CNGB Nucleotide Sequence Archive (CNSA)  
227 with accession number CNP0000818. Genome assembly, protein-coding gene and repeat  
228 annotations are deposited in the *GigaScience* GigaDB [47] and NCBI under accession number  
229 GCA\_011038615.1.

230

## 231 **List of abbreviations**

232 BUSCO: Benchmarking Universal Single-Copy Orthologs; G10K: Genome 10K; NCBI:  
233 National Center for Biotechnology Information; PCR: Polymerase Chain Reaction; ORF: Open  
234 Reading Frame; KEGG: Kyoto Encyclopedia of Genes and Genomes; DOGMA: DOrain-  
235 based General Measure for transcriptome and proteome quality Assessment; CDA: Conserved  
236 Domain Arrangement; CNGB: China National GeneBank; CNSA: CNGB Sequence Archive.

237

## 238 **Funding**

239 This work was funded by the Strategic Priority Research Program of Chinese Academy of  
240 Sciences (No. XDB31020000), a National Key R&D Program of China (MOST) grant (No.  
241 2018YFC1406901), the International Partnership Program of Chinese Academy of Sciences



242 (No. 152453KYSB20170002), a Carlsberg Foundation grant (No. CF16-0663) and the Villum  
243 Foundation (No. 25900).

244

## 245 **Competing interests**

246 The authors declare that they have no competing interests.

247

## 248 **Author contributions**

249 G.Z. and Q.L. conceived and supervised the study; T.B. and S.D. prepared the DNA samples;  
250 Y.Z. and Q.G. performed *k*-mer analysis and genome assembly; Q.G. and J.L. conducted  
251 assessment of assembly quality; H.T. performed protein-coding gene annotation; Y.Z.  
252 performed repeat annotation; G.Z. and S.D. contributed reagents/materials/analysis tools; Q.L.  
253 wrote the manuscript with the inputs from all authors. All authors read and approved the final  
254 manuscript.

255

## 256 **References**

- 257 1. Goodwin S, McPherson JD and McCombie WR. Coming of age: ten years of next-  
258 generation sequencing technologies. *Nature reviews Genetics*. 2016;17 6:333-51.  
259 doi:10.1038/nrg.2016.49.
- 260 2. van Dijk EL, Jaszczyszyn Y, Naquin D and Thermes C. The Third Revolution in  
261 Sequencing Technology. *Trends in genetics : TIG*. 2018;34 9:666-81.  
262 doi:10.1016/j.tig.2018.05.008.
- 263 3. Sebe-Pedros A, Degnan BM and Ruiz-Trillo I. The origin of Metazoa: a unicellular  
264 perspective. *Nature reviews Genetics*. 2017;18 8:498-512. doi:10.1038/nrg.2017.21.
- 265 4. Laumer CE, Fernandez R, Lemer S, Combosch D, Kocot KM, Riesgo A, et al.  
266 Revisiting metazoan phylogeny with genomic sampling of all phyla. *Proceedings*  
267 *Biological sciences / The Royal Society*. 2019;286 1906:20190831.  
268 doi:10.1098/rspb.2019.0831.
- 269 5. Beiki H, Eveland AL and Tuggle CK. Recent advances in plant and animal genomics  
270 are taking agriculture to new heights. *Genome Biol*. 2018;19 1:48.  
271 doi:10.1186/s13059-018-1427-z.
- 272 6. Supple MA and Shapiro B. Conservation of biodiversity in the genomics era. *Genome*  
273 *Biol*. 2018;19 1:131. doi:10.1186/s13059-018-1520-3.
- 274 7. Zhang G, Li C, Li Q, Li B, Larkin DM, Lee C, et al. Comparative genomics reveals  
275 insights into avian genome evolution and adaptation. *Science*. 2014;346 6215:1311-  
276 20. doi:10.1126/science.1251385.

- 277 8. Thomas GWC, Dohmen E, Hughes DST, Murali SC, Poelchau M, Glastad K, et al.  
278 Gene content evolution in the arthropods. *Genome Biol.* 2020;21 1:15.  
279 doi:10.1186/s13059-019-1925-7.
- 280 9. Koepfli KP, Paten B, Genome KCoS and O'Brien SJ. The Genome 10K Project: a  
281 way forward. *Annu Rev Anim Biosci.* 2015;3:57-111. doi:10.1146/annurev-animal-  
282 090414-014900.
- 283 10. Carroll R. The rise of amphibians: 365 million years of evolution. Johns Hopkins  
284 University Press. 2009.
- 285 11. AmphibiaWeb. <<https://amphibiaweb.org>> University of California, Berkeley, CA,  
286 USA. (Accessed 18 Feb 2020).
- 287 12. Li J, Yu H, Wang W, Fu C, Zhang W, Han F, et al. Genomic and transcriptomic  
288 insights into molecular basis of sexually dimorphic nuptial spines in *Leptobrachium*  
289 *leishanense*. *Nat Commun.* 2019;10 1:5551. doi:10.1038/s41467-019-13531-5.
- 290 13. Li Y, Ren Y, Zhang D, Jiang H, Wang Z, Li X, et al. Chromosome-level assembly of  
291 the mustache toad genome using third-generation DNA sequencing and Hi-C analysis.  
292 *Gigascience.* 2019;8 9 doi:10.1093/gigascience/giz114.
- 293 14. Seidl F, Levis NA, Schell R, Pfennig DW, Pfennig KS and Ehrenreich IM. Genome  
294 of *Spea multiplicata*, a Rapidly Developing, Phenotypically Plastic, and Desert-  
295 Adapted Spadefoot Toad. *G3 (Bethesda).* 2019;9 12:3909-19.  
296 doi:10.1534/g3.119.400705.
- 297 15. Edwards RJ, Tuipulotu DE, Amos TG, O'Meally D, Richardson MF, Russell TL, et  
298 al. Draft genome assembly of the invasive cane toad, *Rhinella marina*. *Gigascience.*  
299 2018;7 9 doi:10.1093/gigascience/giy095.
- 300 16. Rogers RL, Zhou L, Chu C, Marquez R, Corl A, Linderoth T, et al. Genomic  
301 Takeover by Transposable Elements in the Strawberry Poison Frog. *Mol Biol Evol.*  
302 2018;35 12:2913-27. doi:10.1093/molbev/msy185.
- 303 17. Denton RD, Kudra RS, Malcom JW, Du Preez L and Malone JH. The African  
304 Bullfrog (*Pyxicephalus adspersus*) genome unites the two ancestral ingredients for  
305 making vertebrate sex chromosomes. *bioRxiv.* 2018:329847.
- 306 18. Hammond SA, Warren RL, Vandervalk BP, Kucuk E, Khan H, Gibb EA, et al. The  
307 North American bullfrog draft genome provides insight into hormonal regulation of  
308 long noncoding RNA. *Nat Commun.* 2017;8 1:1433. doi:10.1038/s41467-017-01316-  
309 7.
- 310 19. Session AM, Uno Y, Kwon T, Chapman JA, Toyoda A, Takahashi S, et al. Genome  
311 evolution in the allotetraploid frog *Xenopus laevis*. *Nature.* 2016;538 7625:336-43.  
312 doi:10.1038/nature19840.
- 313 20. Sun YB, Xiong ZJ, Xiang XY, Liu SP, Zhou WW, Tu XL, et al. Whole-genome  
314 sequence of the Tibetan frog *Nanorana parkeri* and the comparative evolution of  
315 tetrapod genomes. *Proceedings of the National Academy of Sciences of the United*  
316 *States of America.* 2015;112 11:E1257-62. doi:10.1073/pnas.1501764112.

- 317 21. Hellsten U, Harland RM, Gilchrist MJ, Hendrix D, Jurka J, Kapitonov V, et al. The  
318 genome of the Western clawed frog *Xenopus tropicalis*. *Science*. 2010;328 5978:633-  
319 6. doi:10.1126/science.1183670.
- 320 22. The NCBI Assembly database: <https://www.ncbi.nlm.nih.gov/assembly/?term=Anura>;  
321 access on February 18, 2020.
- 322 23. Martin A. Studies in Australian amphibia III. The limnodynastes dorsalis complex  
323 (Anura: Leptodactylidae). *Australian Journal of Zoology*. 1972;20 2:165-211.
- 324 24. Schauble CS, Moritz C and Slade RW. A molecular phylogeny for the frog genus  
325 *Limnodynastes* (Anura: myobatrachidae). *Mol Phylogenet Evol*. 2000;16 3:379-91.  
326 doi:10.1006/mpev.2000.0803.
- 327 25. Bertozzi T and Donnellan S. DNA extraction protocol for the eastern banjo frog using  
328 the Gentra Puregene Tissue Kit. protocols.io 2020;  
329 doi:dx.doi.org/10.17504/protocols.io.bcy6ixze.
- 330 26. Li Q, Guo Q, Zhou Y, Tan H, Bertozzi T, Zhu Y, et al. Construction and sequencing  
331 of DNA libraries on Hiseq 2000 platform for the eastern banjo frog. protocols.io  
332 2020; doi:dx.doi.org/10.17504/protocols.io.bc22iyge.
- 333 27. Chen Y, Chen Y, Shi C, Huang Z, Zhang Y, Li S, et al. SOAPnuke: a MapReduce  
334 acceleration-supported software for integrated quality control and preprocessing of  
335 high-throughput sequencing data. *Gigascience*. 2018;7 1:1-6.  
336 doi:10.1093/gigascience/gix120.
- 337 28. Marcais G and Kingsford C. A fast, lock-free approach for efficient parallel counting  
338 of occurrences of k-mers. *Bioinformatics*. 2011;27 6:764-70.  
339 doi:10.1093/bioinformatics/btr011.
- 340 29. Cai H, Li Q, Fang X, Li J, Curtis NE, Altenburger A, et al. A draft genome assembly  
341 of the solar-powered sea slug *Elysia chlorotica*. *Sci Data*. 2019;6:190022.  
342 doi:10.1038/sdata.2019.22.
- 343 30. Vurture GW, Sedlazeck FJ, Nattestad M, Underwood CJ, Fang H, Gurtowski J, et al.  
344 GenomeScope: fast reference-free genome profiling from short reads. *Bioinformatics*.  
345 2017;33 14:2202-4. doi:10.1093/bioinformatics/btx153.
- 346 31. Kajitani R, Toshimoto K, Noguchi H, Toyoda A, Ogura Y, Okuno M, et al. Efficient  
347 de novo assembly of highly heterozygous genomes from whole-genome shotgun short  
348 reads. *Genome Res*. 2014;24 8:1384-95. doi:10.1101/gr.170720.113.
- 349 32. Li Q, Guo Q, Zhou Y, Tan H, Bertozzi T, Zhu Y, et al. Repetitive element annotation  
350 protocol for the eastern banjo frog. protocols.io 2020;  
351 doi:dx.doi.org/10.17504/protocols.io.bc4niyve.
- 352 33. Smit AF, Hubley R and Green P. Available from <http://www.repeatmasker.org>. 20  
353 September 2019 date last accessed.
- 354 34. Smit A and Hubley R. Available from <http://www.repeatmasker.org/RepeatModeler/>.  
355 20 September 2019 date last accessed.

- 356 35. Benson G. Tandem repeats finder: a program to analyze DNA sequences. *Nucleic acids research*. 1999;27 2:573-80.  
357
- 358 36. Li Q, Guo Q, Zhou Y, Tan H, Bertozzi T, Zhu Y, et al. Protein-coding gene  
359 annotation protocol for the eastern banjo frog. *protocols.io* 2020;  
360 doi:[dx.doi.org/10.17504/protocols.io.bc38iyrw](https://doi.org/10.17504/protocols.io.bc38iyrw).
- 361 37. Altschul SF, Gish W, Miller W, Myers EW and Lipman DJ. Basic local alignment  
362 search tool. *Journal of molecular biology*. 1990;215 3:403-10. doi:10.1016/S0022-  
363 2836(05)80360-2.
- 364 38. Birney E, Clamp M and Durbin R. GeneWise and Genomewise. *Genome Res*.  
365 2004;14 5:988-95. doi:10.1101/gr.1865504.
- 366 39. Stanke M, Diekhans M, Baertsch R and Haussler D. Using native and syntenically  
367 mapped cDNA alignments to improve de novo gene finding. *Bioinformatics*. 2008;24  
368 5:637-44. doi:10.1093/bioinformatics/btn013.
- 369 40. Xiong Z, Li F, Li Q, Zhou L, Gamble T, Zheng J, et al. Draft genome of the leopard  
370 gecko, *Eublepharis macularius*. *Gigascience*. 2016;5 1:47. doi:10.1186/s13742-016-  
371 0151-4.
- 372 41. UniProt Consortium T. UniProt: the universal protein knowledgebase. *Nucleic acids*  
373 *research*. 2018;46 5:2699. doi:10.1093/nar/gky092.
- 374 42. Kanehisa M and Goto S. KEGG: kyoto encyclopedia of genes and genomes. *Nucleic*  
375 *acids research*. 2000;28 1:27-30. doi:10.1093/nar/28.1.27.
- 376 43. Li H. Aligning sequence reads, clone sequences and assembly contigs with BWA-  
377 MEM. arXiv preprint arXiv:13033997. 2013.
- 378 44. Simao FA, Waterhouse RM, Ioannidis P, Kriventseva EV and Zdobnov EM. BUSCO:  
379 assessing genome assembly and annotation completeness with single-copy orthologs.  
380 *Bioinformatics*. 2015;31 19:3210-2. doi:10.1093/bioinformatics/btv351.
- 381 45. Dohmen E, Kremer LP, Bornberg-Bauer E and Kemena C. DOGMA: domain-based  
382 transcriptome and proteome quality assessment. *Bioinformatics*. 2016;32 17:2577-81.  
383 doi:10.1093/bioinformatics/btw231.
- 384 46. Finn RD, Bateman A, Clements J, Coghill P, Eberhardt RY, Eddy SR, et al. Pfam: the  
385 protein families database. *Nucleic acids research*. 2014;42 Database issue:D222-30.  
386 doi:10.1093/nar/gkt1223.
- 387 47. Li Q, Guo Q, Zhou Y, Tan H, Bertozzi T, Zhu Y, et al. Genomic data from the  
388 Eastern banjo frog *Limnodynastes dumerilii dumerilii* (Anura: Limnodynastidae).  
389 GigaScience Database. 2020; doi:<http://dx.doi.org/10.5524/100717>.  
390

## Figures

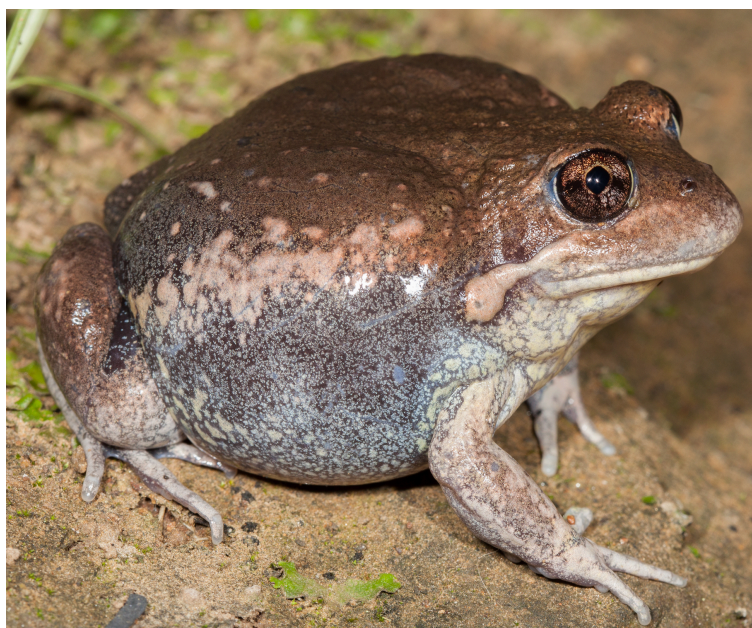

**Figure 1. Photograph of an adult *Limnodynastes dumerilii dumerilii* from the Adelaide region (image from Stephen Mahony).**

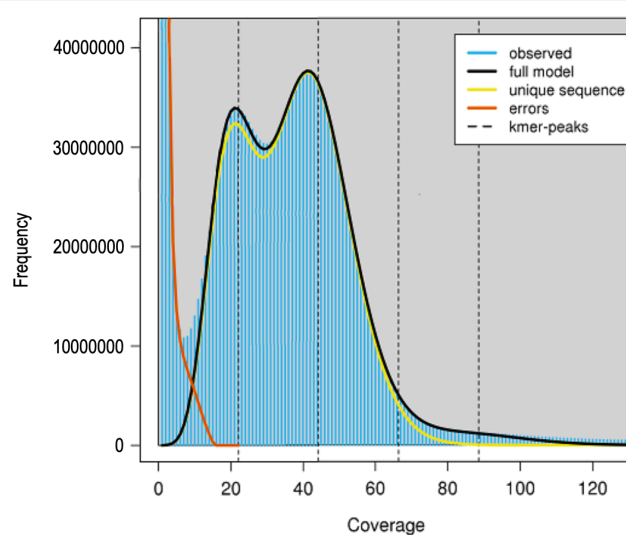

**Figure 2. A 21-mer frequency distribution of the *L. d. dumerilii* genome data. The first peak at coverage 21X corresponds to the heterozygous peak. The second peak at coverage 42X corresponds to the homozygous peak.**

## Tables

**Table 1. Statistics of DNA reads produced for the *L. dumerilii* genome.**

| Insert size (bp) | No. of Libraries | Read length (bp) | Raw data         |                    |                    | Clean data       |                    |                    |
|------------------|------------------|------------------|------------------|--------------------|--------------------|------------------|--------------------|--------------------|
|                  |                  |                  | Total bases (Gb) | Sequence depth (X) | Physical depth (X) | Total bases (Gb) | Sequence depth (X) | Physical depth (X) |
| 170              | 1                | 100              | 43.45            | 17.11              | 14.54              | 36.20            | 14.25              | 12.75              |
| 250              | 1                | 150              | 67.56            | 26.60              | 22.17              | 46.22            | 18.20              | 15.69              |
| 500              | 1                | 150              | 61.47            | 24.20              | 40.33              | 31.02            | 12.21              | 24.43              |
| 800              | 1                | 150              | 38.34            | 15.09              | 40.25              | 16.73            | 6.59               | 21.08              |
| 2,000            | 3                | 49               | 59.90            | 23.58              | 481.28             | 29.85            | 11.75              | 301.33             |
| 5,000            | 3                | 49               | 52.11            | 20.52              | 1046.72            | 11.88            | 4.68               | 299.82             |
| 10,000           | 2                | 49               | 36.81            | 14.49              | 1478.79            | 5.27             | 2.07               | 266.00             |
| 20,000           | 2                | 49               | 36.02            | 14.18              | 2894.10            | 2.54             | 1.00               | 256.41             |
| Total            | 14               |                  | 395.66           | 155.77             | 6018.18            | 179.71           | 70.75              | 1197.50            |

Note: Coverage calculation was based on the estimated haploid genome size of 2.54 Gb according to *k*-mer analysis. Sequence coverage is the average number of times a base is read, while physical coverage is the average number of times a base is spanned by sequenced fragments.

**Table 2. Estimation of genome size and heterozygosity of *L. dumerilii* by *k*-mer analysis.**

| <i>k</i> | Total number of <i>k</i> -mers | Minimum coverage (X) | Number of erroneous <i>k</i> -mers | Homozygous peak | Estimated genome size (Gb) | Estimated heterozygosity (%) |
|----------|--------------------------------|----------------------|------------------------------------|-----------------|----------------------------|------------------------------|
| 17       | 112,401,363,509                | 9                    | 1,418,748,938                      | 45              | 2.47                       | 1.10                         |
| 19       | 110,136,516,133                | 8                    | 2,588,664,358                      | 43              | 2.50                       | 1.23                         |
| 21       | 107,871,808,889                | 7                    | 3,023,604,282                      | 42              | 2.50                       | 1.24                         |
| 23       | 105,607,392,491                | 7                    | 3,286,834,146                      | 40              | 2.56                       | 1.22                         |
| 25       | 103,343,108,760                | 7                    | 3,501,481,190                      | 39              | 2.56                       | 1.19                         |
| 27       | 101,078,882,097                | 7                    | 3,689,197,189                      | 38              | 2.56                       | 1.16                         |
| 29       | 98,815,880,190                 | 6                    | 3,839,002,752                      | 37              | 2.57                       | 1.14                         |
| 31       | 96,552,885,503                 | 6                    | 3,986,778,359                      | 36              | 2.57                       | 1.11                         |

Note: *k*-mer frequency distributions were generated by Jellyfish (v2.2.6) using 130 Gb clean sequences as input. Minimum coverage was the coverage depth value of the first trough in *k*-mer frequency distribution. *k*-mers with coverage depth less than the minimum coverage were regarded as erroneous *k*-mers. Estimated genome size was calculated as (Total number of *k*-mers – Number of erroneous *k*-mers) / Homozygous peak.

**Table 3. Statistics of repetitive sequences identified in the *L. d. dumerilii* genome.**

| Category       | Total repeat length (bp) | % of assembly |
|----------------|--------------------------|---------------|
| DNA            | 155,988,597              | 7.30%         |
| LINE           | 242,754,702              | 11.36%        |
| SINE           | 11,761,904               | 0.55%         |
| LTR            | 97,615,246               | 4.57%         |
| Tandem repeats | 178,355,571              | 8.35%         |
| Unknown        | 704,263,255              | 32.96%        |
| Combined       | 1,205,873,056            | 56.43%        |

Note: DNA: DNA transposon; LINE: long interspersed nuclear element; SINE: short interspersed nuclear elements; LTR: long terminal repeat.

**Table 4. Summary of protein-coding genes annotated in the *L. d. dumerilii* genome.**

| Characteristics of protein-coding genes             |                            |
|-----------------------------------------------------|----------------------------|
| Total number of protein-coding genes                | 24,548                     |
| Gene space (exon + intron; Mb)                      | 634.6 (26.7 % of assembly) |
| Mean gene size (bp)                                 | 25,851                     |
| Mean CDS length (bp)                                | 1,552                      |
| Exon space (Mb)                                     | 38.1 (1.6 % of assembly)   |
| Mean exon number per gene                           | 8.6                        |
| Mean exon length (bp)                               | 181                        |
| Mean intron length (bp)                             | 3,217                      |
| Functional annotation by searching public databases |                            |
| % of proteins with hits in UniProtKB/Swiss-Prot     | 95.8                       |
| % of proteins with hits in NCBI nr database         | 99.6                       |
| % of proteins with KO assigned by KEGG              | 71.3                       |
| % of proteins with functional annotation (combined) | 99.9                       |
